# Supplementary material for: Highly sensitive “signal on” plasmonic ELISA for small molecules by the naked eye
Source: Royal Society of Chemistry journal article supplement (doi:10.1039/c4ay01993h), 2014-10-20
Supplement: c4ay01993h1.pdf [file c4ay01993h1.pdf]

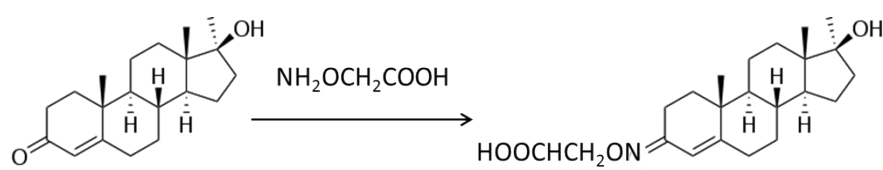

Figure S1 Scheme of preparation of 3-CMO-MT by oximation of carbonyl group at C-3 position

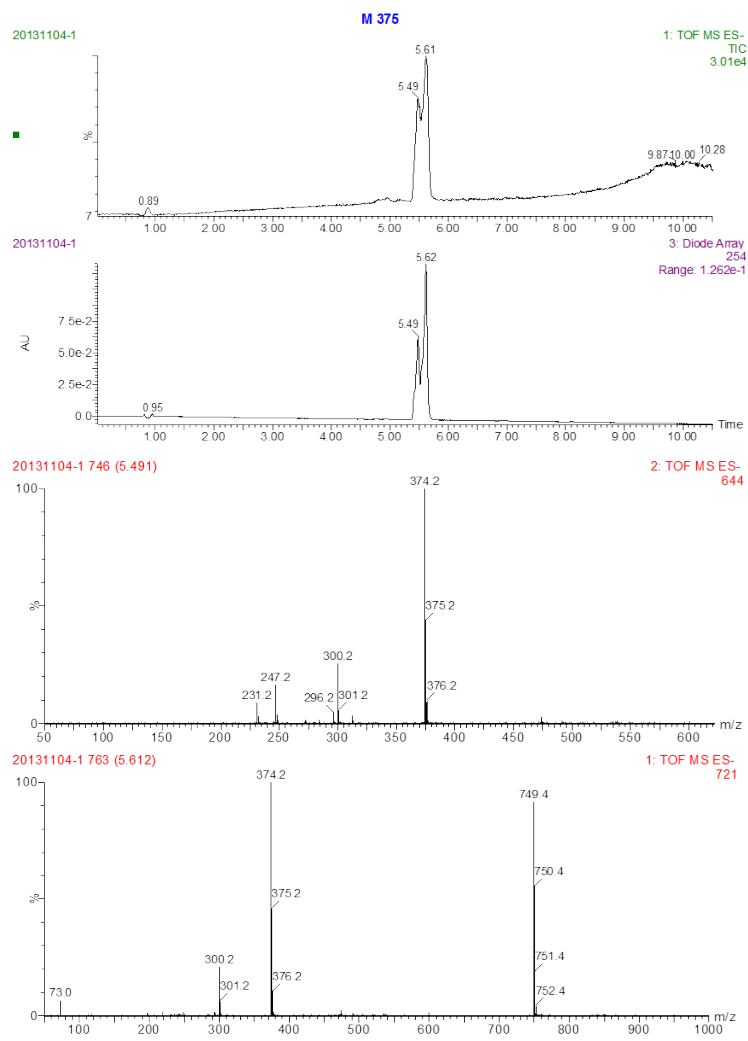

Figure S2 Characterization of 3-CMO-MT by LC-ESI-MS.

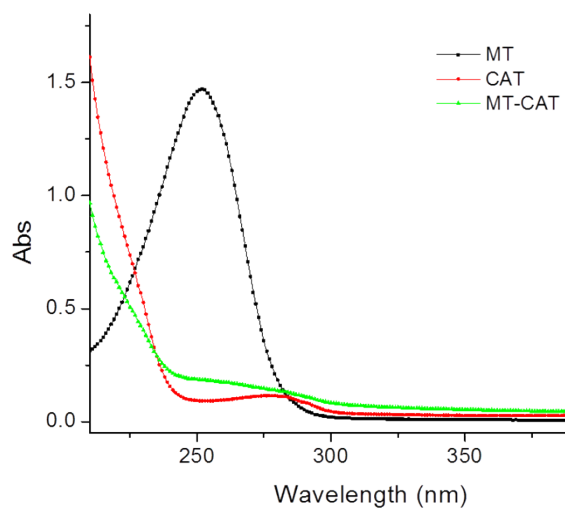

Figure S3 UV-visible spectra of MT-CAT conjugate, MT and CAT.  
CAT: 0.4mg/mL; MT: 0.05mg/mL; MT-CAT: 0.4mg/mL.

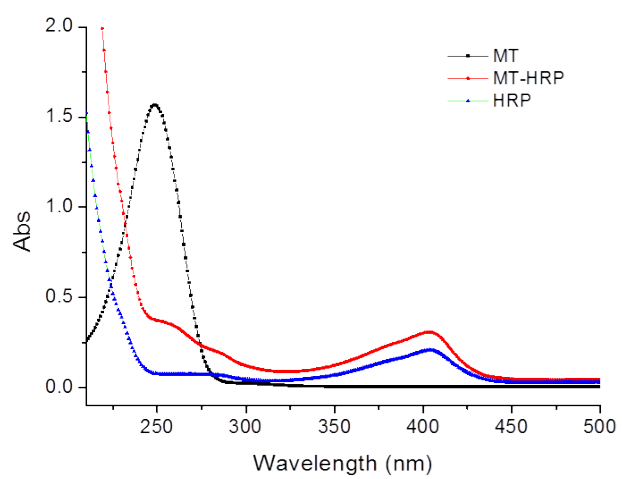

Figure S4. UV-visible spectra of MT-HRP, MT and HRP.  
HRP: 0.4mg/mL; MT: 0.05mg/mL; MT-CAT: 0.4mg/mL.
